# Supplementary material for: The New Buffer Salt Protected Sodium Butyrate Promotes Growth Performance by Improving Intestinal Histomorphology, Barrier Function, Antioxidative Capacity, and Microbiota Community of Broilers
Source: Preprints.org preprint supplement (doi:10.20944/preprints202404.0186.v1), 2024-04-02
Supplement: Supplementary file 3 [file supplementary]

**Supplementary Table (ST1).** Primers used for real-time quantitative PCR (RT-QPCR) analysis.

| Gene | Forward primer (5’ s) and Reverse primer (3’s) | GenBank Accession No. | Bp (product size) |
| --- | --- | --- | --- |
| ZO-1 | F: AATACCTGACTGTCTTGCAG | XM_015278975.1 | 145 |
| R: TAAAGAAGGCTTTCCCTGAC |
| Claudin-1 | F: CAGACTCTAGGTTTTGCCTT | NM_001013611.2 | 149 |
| R: AATCTTTCCAGTGGCGATAC |
| Occludin | F: TCGTGCTGTGCATCGCCATC | NM_205128.1 | 178 |
| R: CGCTGGTTCACCCCTCCGTA |
| Mucin-2 | F: CTGATTGTCACTCACGCCTTAATC | XM_001234581.3 | 147 |
| R: GCCGGCCACCTGCAT |
| β-actin | F: ACCTGAGCGCAAGTACTCTGTCT | NM_205518.1 | 95 |
| R: CATCGTACTCCTGCTTGCTGAT |
